# Supplementary material for: Applying a deep learning pipeline to classify land cover from low-quality historical RGB imagery
Source: PeerJ journal article supplement (doi:10.7717/peerj-cs.2003), 2024-05-14
Supplement: SI.pdf [file SI.pdf]

# **Supporting Information for:** Applying a deep learning pipeline to classify low-quality historical RGB imagery into land cover classes

Harold N. Eyster<sup>1,2,\*</sup> and Brian Beckage<sup>1,2</sup>

<sup>1</sup>Gund Institute for Environment, University of Vermont, USA

<sup>2</sup>Department of Plant Biology, University of Vermont, USA

\*Corresponding author. Please direct any questions or comments to [haroldeyster@gmail.com](mailto:haroldeyster@gmail.com).

## **1 Additional figures**

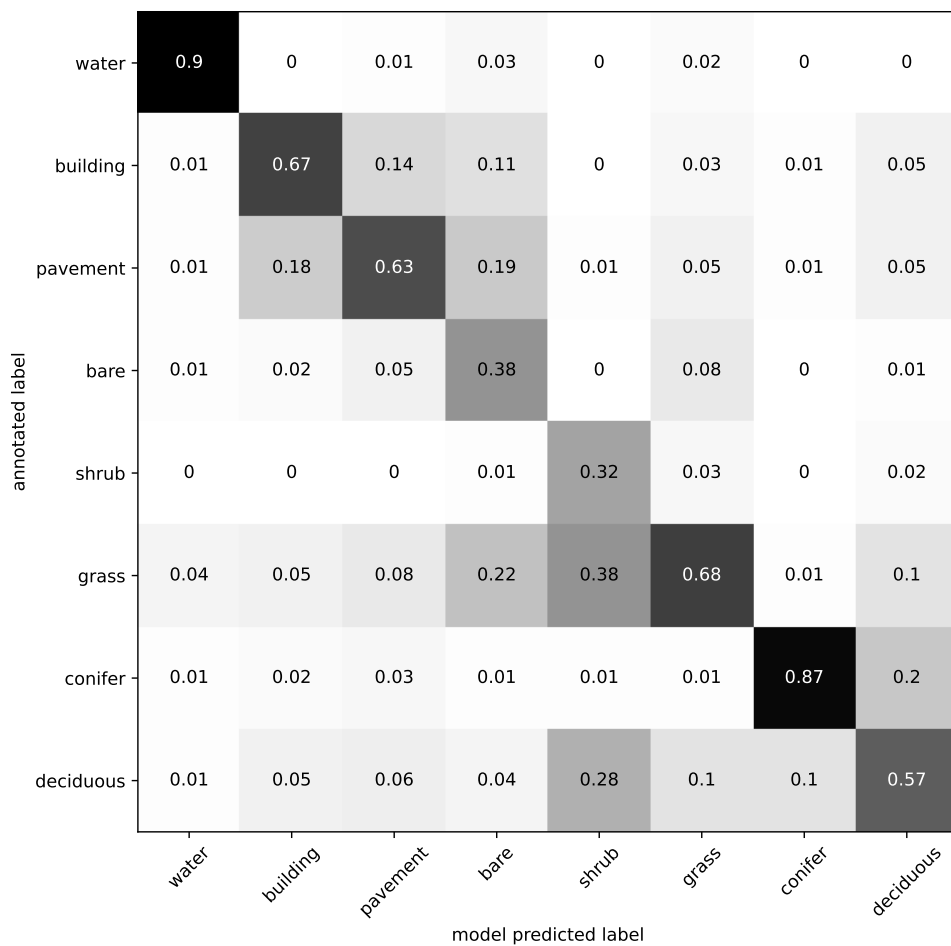

Figure S1: Modern confusion matrix, normalized by column.

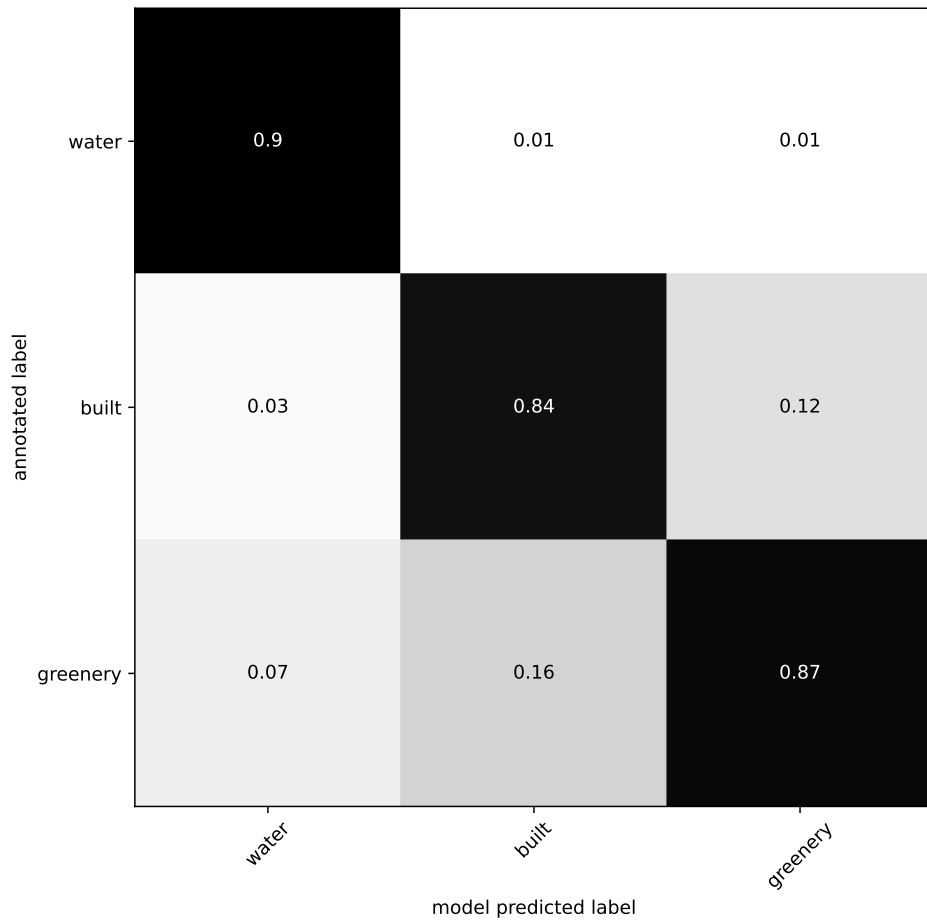

Figure S2: Modern confusion matrix after binning into water, built, and greenery categories, normalized by column.

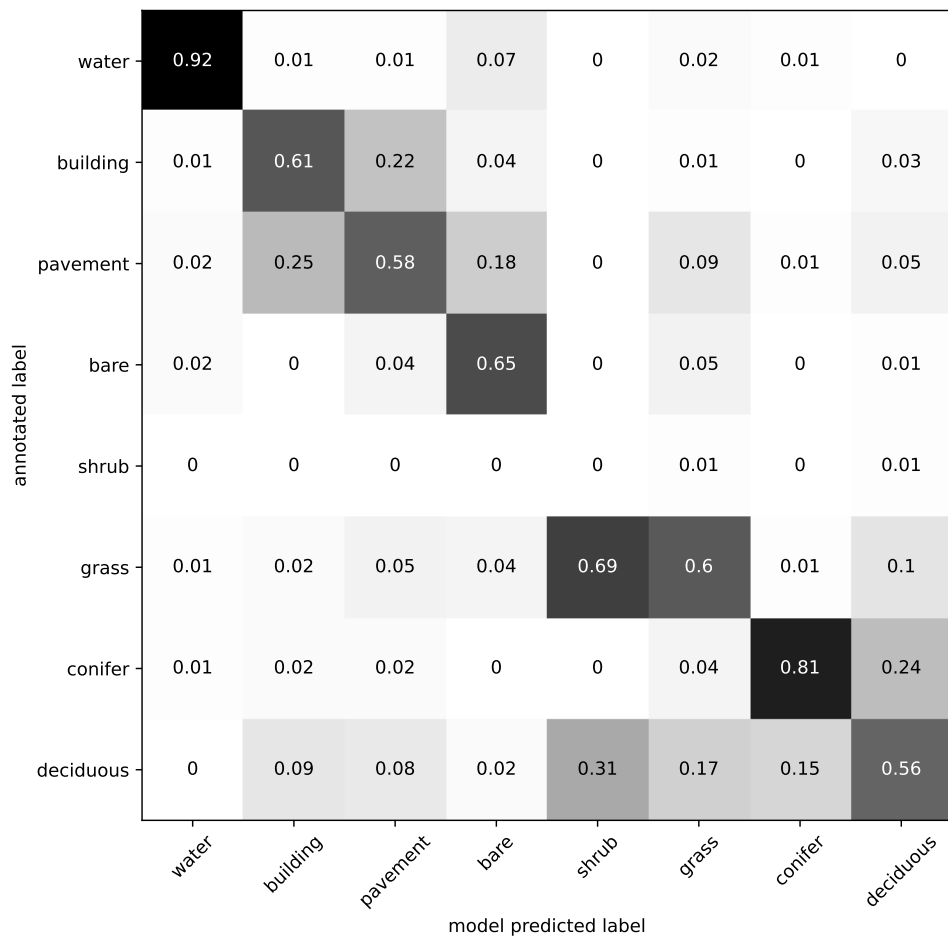

Figure S3: Historical confusion matrix after training on hand-annotated historical imagery augmented by rotation, normalized by column.

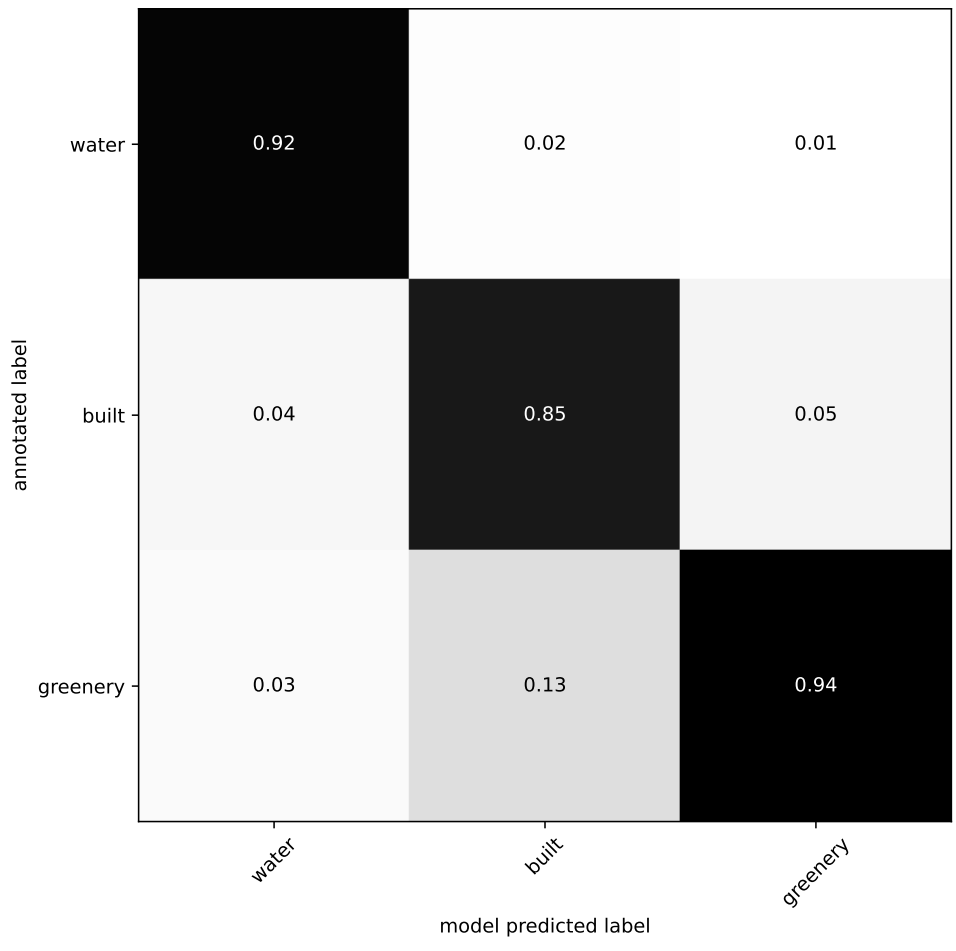

Figure S4: Historical confusion matrix after binning into water, built, and greenery categories and after training on hand-annotated historical imagery augmented by rotation, normalized by column.

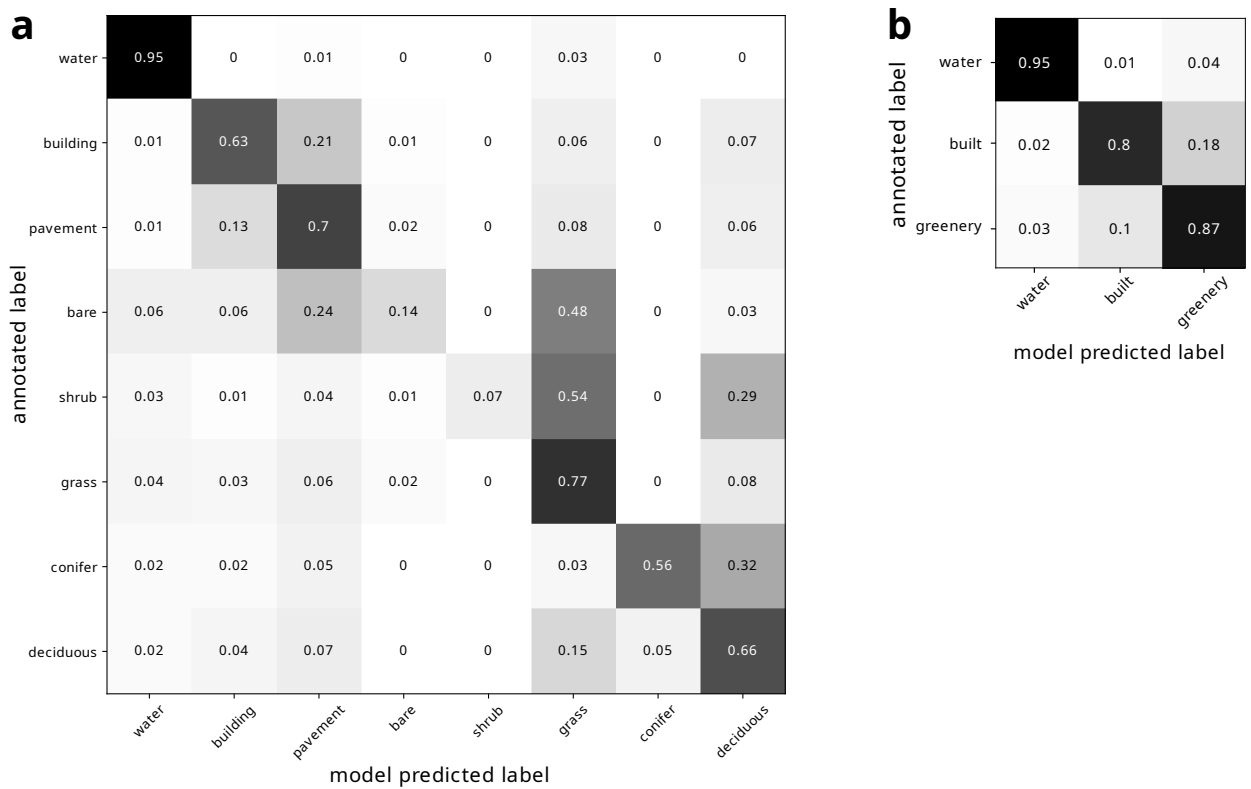

Figure S5: Confusion matrix of modern land cover model predictions, normalized by row of (a) all land cover types and (b) binned land cover categories

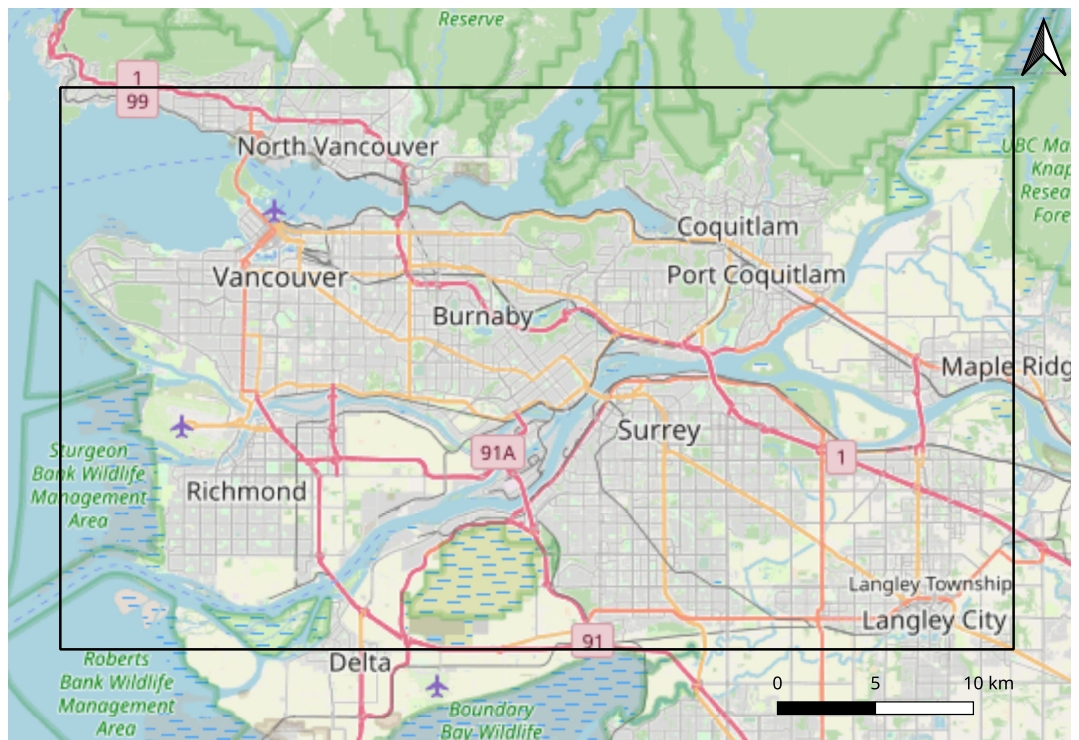

Figure S6: Map of Metro Vancouver, with black bounding box showing extent of training data. Basemap © OpenStreetMap.

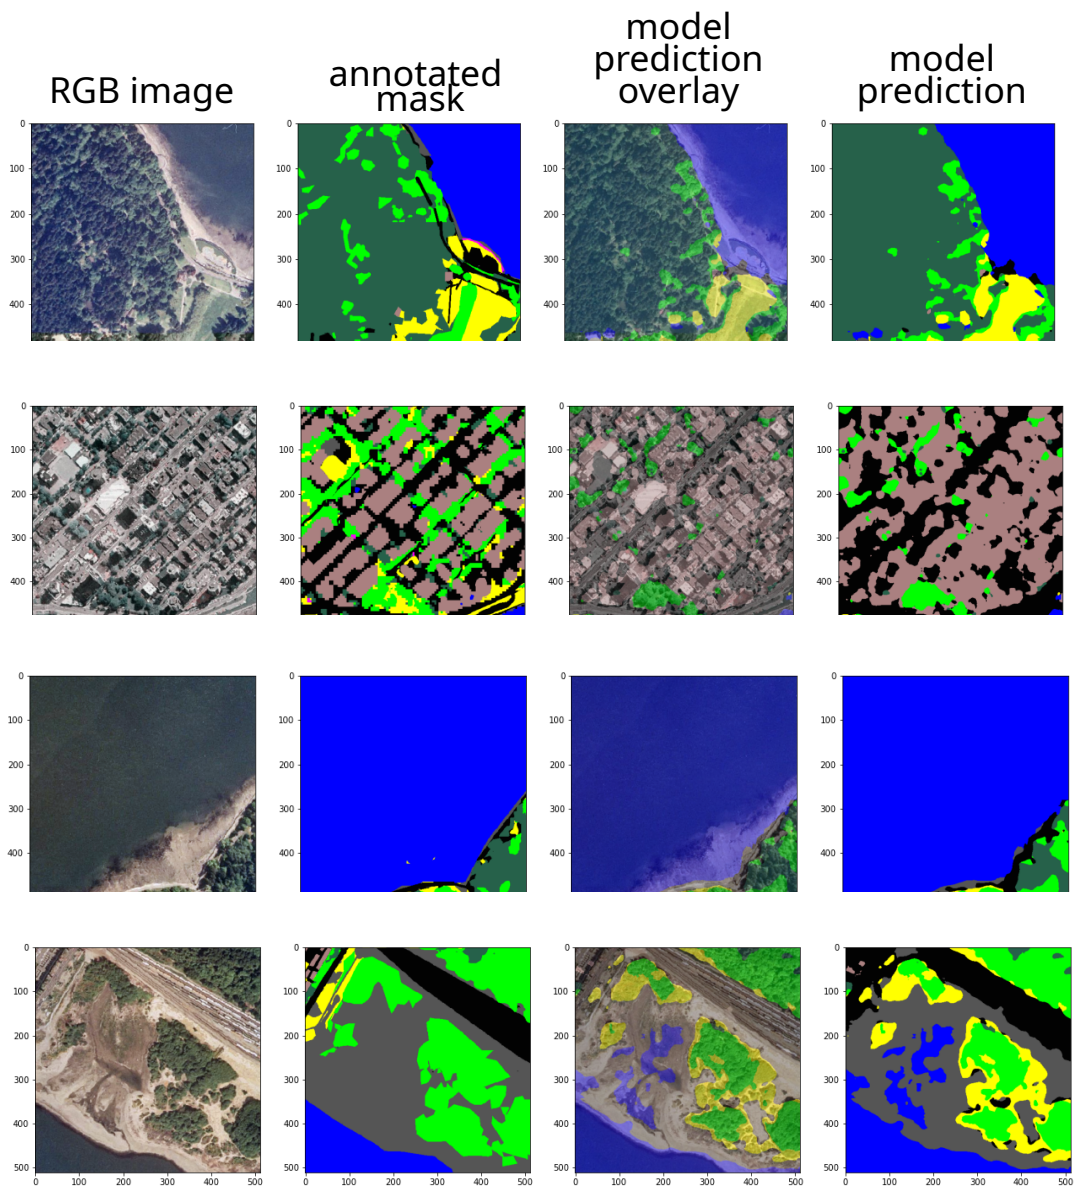

-  water
-  buildings
-  pavement
-  barren
-  grass (including herb)
-  shrub
-  conifer
-  decidous

Figure S7: Historical RGB imagery tiles and land cover predictions.
